# Supplementary material
Source: PubMed Central journal article supplement (PMC5405269)
Supplement: JCM.02408-16_zjm005175484s1.pdf [file JCM.02408-16_zjm005175484s1.pdf]

## SUPPLEMENTAL MATERIAL

**Supplemental Table 1.** Medians of miRNAs expression values from qRT-PCR experiment

|            | <b><math>2^{-\Delta CT}</math> (MEDIAN)</b> |           |           |
|------------|---------------------------------------------|-----------|-----------|
|            | <b>Healty</b>                               | <b>LL</b> | <b>TT</b> |
|            | <b>control</b>                              |           |           |
| miR-101    | 0.000158                                    | 0.000085  | 0.000032  |
| miR-125b   | 0.062728                                    | 0.025480  | 0.006089  |
| miR-196b   | 0.034144                                    | 0.005964  | 0.000370  |
| miR-26a    | 0.194189                                    | 0.095560  | 0.016690  |
| miR-27a    | 0.007599                                    | 0.002923  | 0.002834  |
| miR-27b    | 0.024220                                    | 0.007198  | 0.001648  |
| miR-29c    | 0.000318                                    | 0.000194  | 0.000012  |
| miR-34c    | 0.032532                                    | 0.006924  | 0.008581  |
| miR-425-5p | 0.012199                                    | 0.026915  | 0.004551  |
| miR-452    | 0.037138                                    | 0.025655  | 0.003609  |
| miR-455-3p | 0.001856                                    | 0.000507  | 0.000386  |

|            |          |          |          |
|------------|----------|----------|----------|
| miR-502-3p | 0.000419 | 0.000303 | 0.000024 |
| miR-539    | 0.002949 | 0.000485 | 0.001431 |
| miR-660    | 0.009529 | 0.004937 | 0.002680 |
| miR-92a    | 0.008199 | 0.004379 | 0.002393 |
| miR-99a    | 0.081285 | 0.109929 | 0.018840 |

---

$2^{-\Delta Ct}$  median of each miRNAs from validation experiment.

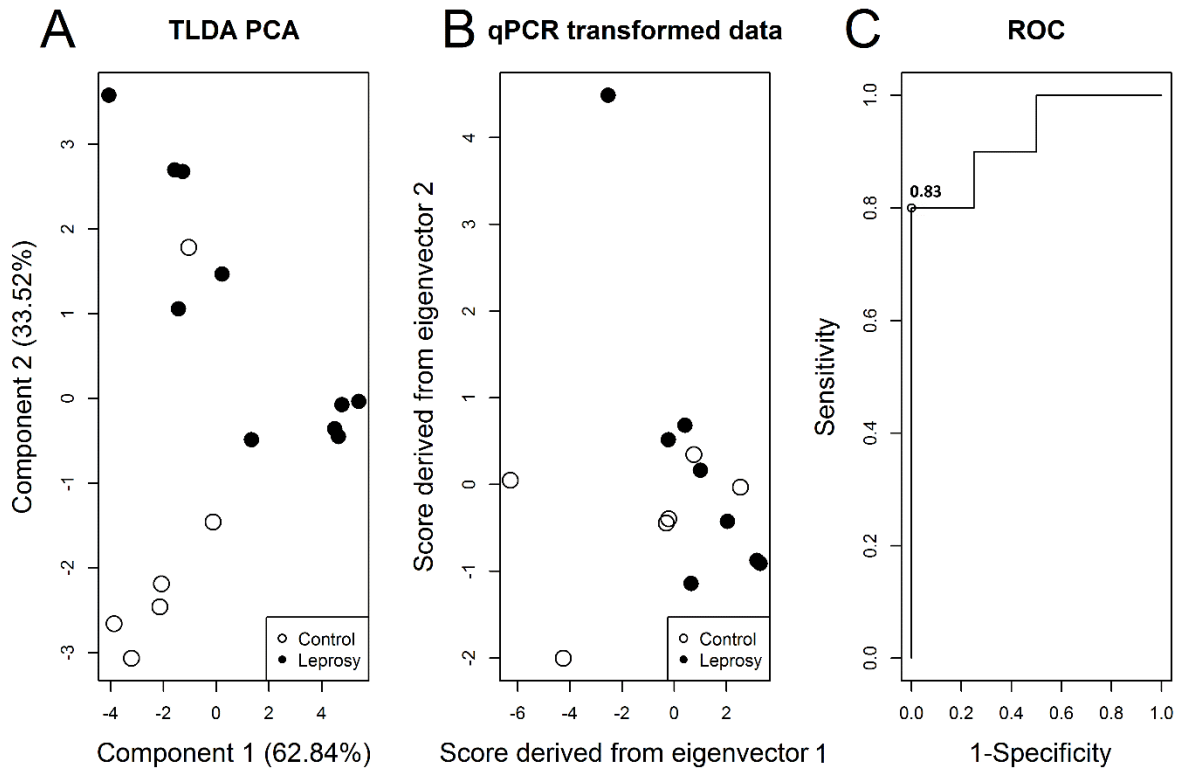

**Figure SF1.** Diagnostic power evaluation of miRNAs for discrimination between leprosy patients and healthy controls using sixteen miRNAs.

Principal components scores of TLDA expression data of miR-539, miR-125b, miR-196b, miR-26a, miR-27a, miR-27b, miR-92a, miR-99a, miR-101, miR-29c, miR-34c, miR-425-5p, and miR-660 indicate separation between leprosy group and healthy control group (A). Normalized eigenvectors were used to transform qRT-PCR data revealing a separation between the groups and high correlation of the data (B). The first qRT-PCR transformed score was evaluated in a ROC analyses after a logistic regression revealing 70% sensitivity and 100% specificity with the cutoff of 0.83 and AUC 92.5% (95% CI: 78.4%-100.0% ) for discrimination of leprosy patients and healthy control (C).

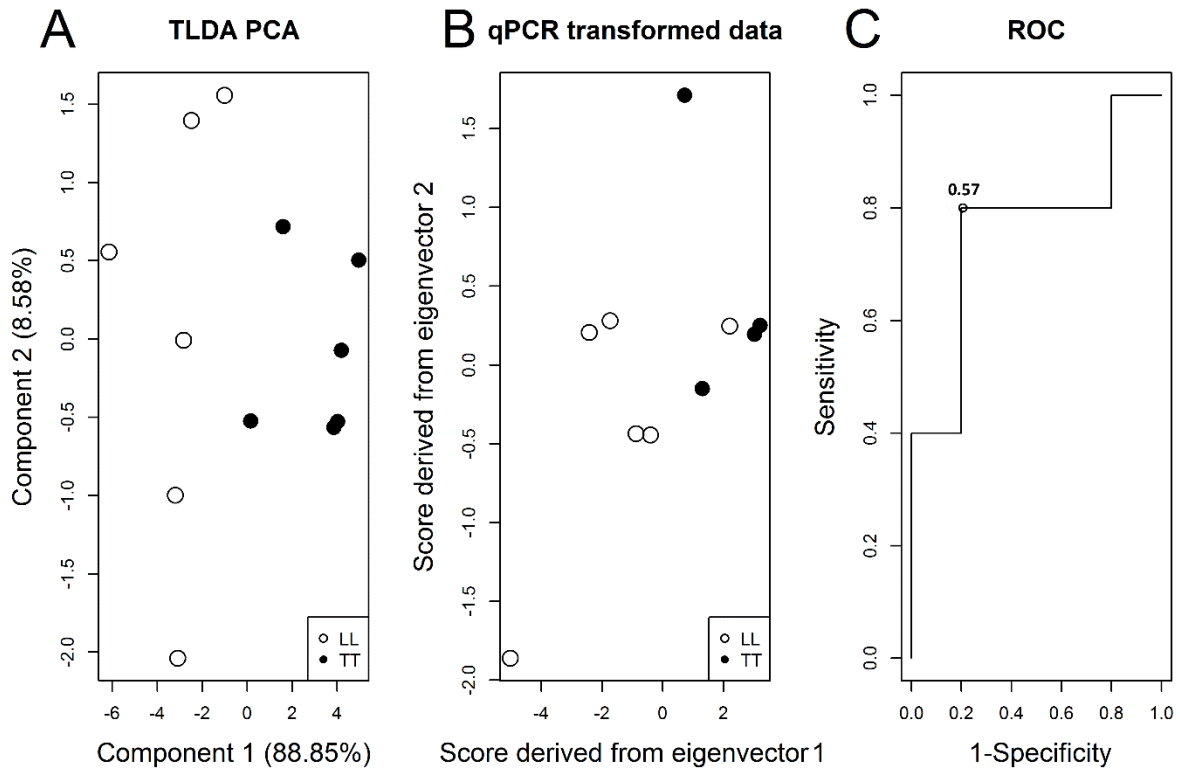

**Figure SF2.** Diagnostic power evaluation of miRNAs for discrimination between LL and TT patients using sixteen miRNAs.

Principal components scores of TLDA expression data of miR-539, miR-125b, miR-196b, miR-26a, miR-27a, miR-27b, miR-92a, miR-99a, miR-101, miR-29c, miR-34c, miR-425-5p, and miR-660 indicates separation between LL and TT groups (A). Normalized eigenvectors were used to transform qRT-PCR data revealing a separation between the groups (B). The first qRT-PCR transformed score was evaluated in a ROC analyses after a logistic regression revealing 80% sensitivity and 80% specificity with the cutoff of 0.57 and AUC 76% (95% CI: 41.4%-100.0% ) for discrimination of LL and TT patients (C).
